## CORRECTIONS

### Mind the gap: cytochrome interactions reveal electron pathways across the periplasm of *Shewanella oneidensis* MR-1

B. M. FONSECA, C. M. PAQUETE, S. E. NETO, I. PACHECO, C. M. SOARES and R. O. LOURO

Volume 449 (2013), pp. 101–108

The published version of equation (2) (page 103) contained an error. The correct version appears here.

$$A = 1 + R + \frac{K_d([Cyt_A]_0 R + [Cyt_B]_0)}{[Cyt_A]_0 [Cyt_B]_0}$$

### G-protein-coupled receptor structure, ligand binding and activation as studied by solid-state NMR spectroscopy

X. DING, X. ZHAO and A. WATTS

Volume 450 (2013), pp. 443–457

Owing to an error introduced during the production process, the acknowledgements of the funding provided to Xin Zhao were not included in the published article. The complete funding acknowledgements appear here.

Financial support to X.Z. by the National Natural Science Foundation [grant number 30970657], Shanghai Pujiang Program [grant number 09PJ1404300] and the start funds

by East China Normal University [grant numbers 79003A29, 79301207 and 79301411] are gratefully acknowledged. Financial support to A.W. from the Medical Research Council and Engineering and Physical Sciences Research Council, and the State Administration of Foreign Experts Affairs, P.R. China, through the High-end Foreign Experts Recruitment Program [grant number GDW 20123100086] are very much appreciated.

### Identification of novel candidate phosphatidic acid-binding proteins involved in the salt-stress response of *Arabidopsis thaliana* roots

F. McLOUGHLIN, S. A. ARISZ, H. L. DEKKER, G. KRAMER, C. G. DE KOSTER, M. A. HARING, T. MUNNIK and C. TESTERINK

Volume 450 (2013), pp. 573–581

1. The ‘Introduction’ section (third paragraph; page 574) contained a typographical error in the definition of ‘PH domain’: the correct spelling is ‘PH (pleckstrin homology) domain’.

2. Reference [35] was incorrectly deleted in the published article. The correct reference is presented here along with its correct citation in the section ‘PA-binding assay’ (page 574):

The PA-binding assay was conducted as described [29,35].

35 McLoughlin, F. and Testerink, C. (2013) Lipid affinity beads—from identifying new lipid binding proteins to assessing their binding properties. In Plant Lipid Signaling Protocols (Munnik, T. and Heilmann, I., eds), Humana Press, New York, in the press

3. The abbreviation ‘n.d.’ in Table 1 is incorrectly defined as ‘not determined’; the correct definition is ‘not detected’.

These errors were introduced during the production process.
